# Supplementary material
Source: PubMed Central journal article supplement (PMC5298896)
Supplement: NIHMS784809-supplement-2.pdf [file NIHMS784809-supplement-2.pdf]

| Cancer | Survival  | Age         | Gender   | Race     |          |
|--------|-----------|-------------|----------|----------|----------|
|        | HR        | Correlation | FC (M/F) | FC (A/W) | FC (B/W) |
| BLCA   | 5.60E-07  | -0.0234     | 0.94     | 0.78*    | 0.96     |
| BRCA   | 1.90E-22  | -0.1286*    | NA       | 0.92     | 0.95     |
| CESC   | 9.20E-23  | 0.0922      | NA       | NA       | 1.1      |
| COAD   | 1.10E-24  | 0.036       | 1.12     | NA       | 0.85     |
| GBM    | 1.90E+20  | -0.0841     | NA       | NA       | NA       |
| HNSC   | 5.80E-50  | -0.0452     | 0.97     | NA       | 1        |
| KIRC   | 2.50E-31  | -0.0557     | 0.89*    | NA       | 0.97     |
| LGG    | 3.2e+153* | 0.0409      | 1.02     | NA       | NA       |
| LIHC   | 5.10E-08  | 0.0267      | 1        | 0.97     | NA       |
| LUAD   | 2.20E-42  | -0.0298     | 0.92*    | NA       | 1.09     |
| LUSC   | 1.20E+54  | 0.0193      | 0.93     | NA       | 0.94     |
| MESO   | 5.90E-05  | NA          | NA       | NA       | NA       |
| PAAD   | 8.70E+01  | 0.011       | 0.73*    | NA       | NA       |
| SARC   | 4.40E-77  | -0.0045     | 1.1      | NA       | NA       |
| SKCM   | 1.70E-06  | -0.0888     | 0.98     | NA       | NA       |
| KIRP   | NA        | -0.0818     | 0.88     | NA       | 1.06     |
| PCPG   | NA        | -0.0553     | 0.98     | NA       | NA       |
| PRAD   | NA        | 0.0502      | NA       | NA       | NA       |
| TGCT   | NA        | -0.1815     | NA       | NA       | NA       |
| THCA   | NA        | -0.0146     | 0.92     | 0.87     | 1.08     |
| UCEC   | NA        | -0.0593     | NA       | NA       | 1.17     |

\*: FDR<0.1

HR: Hazard Ratio from Cox proportional hazard model

M/F: Male/Female

A/W: Asian/White

B/W: Black/White

Supplementary Table 1. Clinical associations of CPK. Associations of CPK with patient survival, age, gender and race were documented in this table. Hazard ratios were obtained from multivariate Cox regression corrected for patient age and clinical stage. Statistical significance for age association was evaluated using Spearman's correlation and that for fold changes of gender and race were evaluated using Wilcoxon test.

| Pos | Peptide    | ID        | HLA-A*0101 |      | HLA-A*0201    |         | HLA-A*0301 |               | HLA-A*2402 |      | HLA-A*2601    |         | HLA-A*3001 |               | Core    |    |               |         |  |               |
|-----|------------|-----------|------------|------|---------------|---------|------------|---------------|------------|------|---------------|---------|------------|---------------|---------|----|---------------|---------|--|---------------|
|     |            |           | nM         | Rank | Core          | nM      | Rank       | Core          | nM         | Rank | Core          | nM      | Rank       | Core          |         | nM | Rank          | Core    |  |               |
| 0   | SCLKTSLKV  | PRAMEF4   | 25294.9    |      | 20 SCLKTSLKV  | 7701.2  |            | 13 SCLKTSLKV  | 30301.2    |      | 39 SCLKTSLKV  | 22481.7 |            | 15 SCLKTSLKV  | 35319.2 |    | 65 SCLKTSLKV  | 8575.8  |  | 12 SCLKTSLKV  |
| 1   | CLKTSLKV   | PRAMEF4   | 23310      |      | 15 CLKTSLKV   | 10532.7 |            | 16 CLKTSLKV   | 21045.8    |      | 20 CLKTSLKV   | 27503   |            | 20 CLKTSLKV   | 22510.9 |    | 14 CLKTSLKV   | 7416.3  |  | 11 CLKTSLKV   |
| 2   | LKTSLKVLT  | PRAMEF4   | 28402.7    |      | 30 LKTSLKVLT  | 36004.8 |            | 70 LKTSLKVLT  | 39281      |      | 75 LKTSLKVLT  | 41263.2 |            | 55 LKTSLKVLT  | 31876.1 |    | 42 LKTSLKVLT  | 20418   |  | 33 LKTSLKVLT  |
| 3   | KTSLKVLT   | PRAMEF4   | 15455.2    |      | 5.5 KTSLKVLT  | 3153.7  |            | 7.5 KTSLKVLT  | 9091.5     |      | 8 KTSLKVLT    | 3059.5  |            | 2.5 KTSLKVLT  | 27146.2 |    | 24 KTSLKVLT   | 272.2   |  | 1 KTSLKVLT    |
| 4   | TSKVLVLT   | PRAMEF4   | 23587      |      | 16 TSKVLVLT   | 17143.4 |            | 23 TSKVLVLT   | 29048.2    |      | 36 TSKVLVLT   | 35309.3 |            | 33 TSKVLVLT   | 26396   |    | 21 TSKVLVLT   | 8069.6  |  | 12 TSKVLVLT   |
| 5   | SLKVLVLT   | PRAMEF4   | 30290      |      | 38 SLKVLVLT   | 18641.5 |            | 25 SLKVLVLT   | 21597.4    |      | 21 SLKVLVLT   | 39622.1 |            | 46 SLKVLVLT   | 29279.5 |    | 30 SLKVLVLT   | 6220    |  | 9 SLKVLVLT    |
| 6   | LKVLVLT    | PRAMEF4   | 29908.7    |      | 36 LKVLVLT    | 22254.4 |            | 31 LKVLVLT    | 36767      |      | 65 LKVLVLT    | 42429   |            | 60 LKVLVLT    | 27354.3 |    | 24 LKVLVLT    | 18435.5 |  | 29 LKVLVLT    |
| 7   | KVLVLT     | PRAMEF4   | 19774.4    |      | 9.5 KVLVLT    | 92.7    |            | 1 KVLVLT      | 10696.8    |      | 9 KVLVLT      | 20193.9 |            | 13 KVLVLT     | 27745.4 |    | 25 KVLVLT     | 153.5   |  | 0.7 KVLVLT    |
| 8   | VLVLT      | PRAMEF4   | 15615.9    |      | 5.5 VLVLT     | 1419.5  |            | 5 VLVLT       | 14613.5    |      | 13 VLVLT      | 20175.3 |            | 13 VLVLT      | 22368.1 |    | 13 VLVLT      | 9423.3  |  | 14 VLVLT      |
| 0   | SCLKTSLKF  | PRAMEF4-W | 23239.7    |      | 15 SCLKTSLKF  | 23792.4 |            | 33 SCLKTSLKF  | 27743      |      | 32 SCLKTSLKF  | 1533.9  |            | 1.5 SCLKTSLKF | 28631.9 |    | 28 SCLKTSLKF  | 14423.4 |  | 21 SCLKTSLKF  |
| 1   | CLKTSLKF   | PRAMEF4-W | 21133.9    |      | 11 CLKTSLKF   | 5163.6  |            | 14 CLKTSLKF   | 16355.2    |      | 14 CLKTSLKF   | 26828.5 |            | 19 CLKTSLKF   | 18132.6 |    | 8 CLKTSLKF    | 2374.1  |  | 4 CLKTSLKF    |
| 2   | LKTSLKFLT  | PRAMEF4-W | 27242.7    |      | 26 LKTSLKFLT  | 32510.7 |            | 55 LKTSLKFLT  | 39806.4    |      | 80 LKTSLKFLT  | 35520.4 |            | 33 LKTSLKFLT  | 30736.7 |    | 36 LKTSLKFLT  | 20091.2 |  | 32 LKTSLKFLT  |
| 3   | KTSLKFLT   | PRAMEF4-W | 13318.9    |      | 4.5 KTSLKFLT  | 3583.3  |            | 8 KTSLKFLT    | 7546.1     |      | 7 KTSLKFLT    | 1037.6  |            | 1.2 KTSLKFLT  | 26131.2 |    | 21 KTSLKFLT   | 155.5   |  | 0.7 KTSLKFLT  |
| 4   | TSLKFLTIT  | PRAMEF4-W | 22797.2    |      | 14 TSKFLTIT   | 15189.6 |            | 21 TSKFLTIT   | 28645      |      | 35 TSKFLTIT   | 33675   |            | 29 TSKFLTIT   | 27024.8 |    | 23 TSKFLTIT   | 6407.1  |  | 9 TSKFLTIT    |
| 5   | SLKFLTIT   | PRAMEF4-W | 29283.3    |      | 33 SLKFLTIT   | 16991.2 |            | 23 SLKFLTIT   | 15814      |      | 14 SLKFLTIT   | 36458   |            | 36 SLKFLTIT   | 28029.6 |    | 26 SLKFLTIT   | 5464    |  | 8 SLKFLTIT    |
| 6   | LKFLTITNC  | PRAMEF4-W | 26866.2    |      | 24 LKFLTITNC  | 15234.4 |            | 21 LKFLTITNC  | 33859.5    |      | 55 LKFLTITNC  | 40018   |            | 47 LKFLTITNC  | 27927.3 |    | 26 LKFLTITNC  | 13017.7 |  | 19 LKFLTITNC  |
| 7   | KFLTITNCV  | PRAMEF4-W | 20169.9    |      | 9.5 KFLTITNCV | 2837.9  |            | 7 KFLTITNCV   | 17616.8    |      | 40 KFLTITNCV  | 2731.9  |            | 2.5 KFLTITNCV | 31633.2 |    | 40 KFLTITNCV  | 434.8   |  | 1.3 KFLTITNCV |
| 8   | FLTITNCV   | PRAMEF4-W | 12064.9    |      | 4 FLTITNCV    | 171.4   |            | 1.5 FLTITNCV  | 16585.3    |      | 14 FLTITNCV   | 24151.3 |            | 16 FLTITNCV   | 15767.4 |    | 6.5 FLTITNCV  | 14539   |  | 22 FLTITNCV   |
| 0   | TGDTPLPDP  | MUC4      | 25662.2    |      | 21 TGDTPLPDP  | 38379.5 |            | 75 TGDTPLPDP  | 37605      |      | 70 TGDTPLPDP  | 43003.5 |            | 65 TGDTPLPDP  | 37757.9 |    | 80 TGDTPLPDP  | 34600.9 |  | 75 TGDTPLPDP  |
| 1   | GDTPLPDP   | MUC4      | 34492.5    |      | 60 GDTPLPDP   | 40360.3 |            | 85 GDTPLPDP   | 38597.3    |      | 75 GDTPLPDP   | 46948.5 |            | 95 GDTPLPDP   | 37680.4 |    | 80 GDTPLPDP   | 26445.5 |  | 48 GDTPLPDP   |
| 2   | DTPLPDP    | MUC4      | 30200.7    |      | 37 DTPLPDP    | 42032.4 |            | 90 DTPLPDP    | 43469.4    |      | 95 DTPLPDP    | 42060.6 |            | 60 DTPLPDP    | 34285.6 |    | 55 DTPLPDP    | 32453.1 |  | 70 DTPLPDP    |
| 3   | TPPLPDP    | MUC4      | 32411.3    |      | 48 TPPLPDP    | 38096.5 |            | 75 TPPLPDP    | 39851.2    |      | 75 TPPLPDP    | 43565.5 |            | 70 TPPLPDP    | 31777.9 |    | 41 TPPLPDP    | 29554.7 |  | 60 TPPLPDP    |
| 4   | TPLPDP     | MUC4      | 33510.3    |      | 55 TPLPDP     | 41465.1 |            | 90 TPLPDP     | 43612.7    |      | 95 TPLPDP     | 42616.8 |            | 60 TPLPDP     | 34793.1 |    | 60 TPLPDP     | 34615.9 |  | 75 TPLPDP     |
| 5   | PLPDP      | MUC4      | 32750.8    |      | 50 PLPDP      | 33099.9 |            | 60 PLPDP      | 42570.7    |      | 90 PLPDP      | 43908.6 |            | 70 PLPDP      | 32335.6 |    | 44 PLPDP      | 36535.4 |  | 85 PLPDP      |
| 6   | LPDTPDSSA  | MUC4      | 24444.2    |      | 18 LPDTPDSSA  | 33433.2 |            | 60 LPDTPDSSA  | 38306.1    |      | 70 LPDTPDSSA  | 46379   |            | 90 LPDTPDSSA  | 31670.5 |    | 41 LPDTPDSSA  | 32627   |  | 70 LPDTPDSSA  |
| 7   | PDPDTPDSSA | MUC4      | 33800.9    |      | 55 PDPDTPDSSA | 45930.6 |            | 95 PDPDTPDSSA | 43412.6    |      | 95 PDPDTPDSSA | 46078.9 |            | 90 PDPDTPDSSA | 35031.9 |    | 60 PDPDTPDSSA | 37340.7 |  | 85 PDPDTPDSSA |
| 8   | DTDTPDSSA  | MUC4      | 3239.9     |      | 1.2 DTDTPDSSA | 37837.7 |            | 75 DTDTPDSSA  | 38791.5    |      | 75 DTDTPDSSA  | 45198.5 |            | 80 DTDTPDSSA  | 26057.2 |    | 21 DTDTPDSSA  | 32292.3 |  | 70 DTDTPDSSA  |
| 0   | TGDTPLPVP  | MUC4-WT   | 4277.8     |      | 1.4 TGDTPLPVP | 13450.1 |            | 19 TGDTPLPVP  | 29404.6    |      | 37 TGDTPLPVP  | 40276.5 |            | 48 TGDTPLPVP  | 34484.3 |    | 60 TGDTPLPVP  | 20945.6 |  | 34 TGDTPLPVP  |
| 1   | GDTPLPVP   | MUC4-WT   | 33224      |      | 55 GDTPLPVP   | 39034.9 |            | 80 GDTPLPVP   | 34812.3    |      | 55 GDTPLPVP   | 45918.2 |            | 65 GDTPLPVP   | 35370.1 |    | 65 GDTPLPVP   | 23037.2 |  | 39 GDTPLPVP   |
| 2   | DTPLPVP    | MUC4-WT   | 30939.6    |      | 41 DTPLPVP    | 38360.8 |            | 75 DTPLPVP    | 40256.5    |      | 80 DTPLPVP    | 39888.3 |            | 47 DTPLPVP    | 32523.4 |    | 45 DTPLPVP    | 28416.8 |  | 55 DTPLPVP    |
| 3   | TPPLPVP    | MUC4-WT   | 30859.7    |      | 40 TPPLPVP    | 32766.7 |            | 55 TPPLPVP    | 35289.8    |      | 60 TPPLPVP    | 41423.4 |            | 55 TPPLPVP    | 26340.9 |    | 21 TPPLPVP    | 26186.4 |  | 47 TPPLPVP    |
| 4   | TPLPVP     | MUC4-WT   | 29066.8    |      | 32 TPLPVP     | 35736.3 |            | 65 TPLPVP     | 41175.4    |      | 85 TPLPVP     | 40560.8 |            | 49 TPLPVP     | 31571.6 |    | 40 TPLPVP     | 28387.6 |  | 55 TPLPVP     |
| 5   | PLPVP      | MUC4-WT   | 31011.3    |      | 41 PLPVP      | 35782.3 |            | 65 PLPVP      | 42050.2    |      | 90 PLPVP      | 44060.9 |            | 70 PLPVP      | 32570.2 |    | 45 PLPVP      | 34877.2 |  | 75 PLPVP      |
| 6   | LPVDTSSA   | MUC4-WT   | 28539.5    |      | 30 LPVDTSSA   | 37010.9 |            | 70 LPVDTSSA   | 38363.3    |      | 75 LPVDTSSA   | 45206.8 |            | 80 LPVDTSSA   | 24141.1 |    | 16 LPVDTSSA   | 24478.3 |  | 42 LPVDTSSA   |
| 7   | PVDTSSA    | MUC4-WT   | 29924.5    |      | 36 PVDTSSA    | 43176.5 |            | 95 PVDTSSA    | 38662.9    |      | 75 PVDTSSA    | 45788.2 |            | 85 PVDTSSA    | 25782.9 |    | 20 PVDTSSA    | 28380.9 |  | 55 PVDTSSA    |
| 8   | VTDTSSA    | MUC4-WT   | 1409.2     |      | 0.7 VTDTSSA   | 19644.3 |            | 27 VTDTSSA    | 31028.4    |      | 41 VTDTSSA    | 42874.8 |            | 65 VTDTSSA    | 30872   |    | 37 VTDTSSA    | 21027.1 |  | 34 VTDTSSA    |
| 0   | THITEPSTG  | MUC5B     | 31477.1    |      | 43 THITEPSTG  | 43622.1 |            | 95 THITEPSTG  | 42816      |      | 95 THITEPSTG  | 27987.5 |            | 21 THITEPSTG  | 33498.7 |    | 50 THITEPSTG  | 31712   |  | 65 THITEPSTG  |
| 1   | HITEPSTGT  | MUC5B     | 30654.7    |      | 39 HITEPSTGT  | 20625.4 |            | 28 HITEPSTGT  | 25423.6    |      | 27 HITEPSTGT  | 45841.2 |            | 85 HITEPSTGT  | 21782.5 |    | 12 HITEPSTGT  | 19902.1 |  | 32 HITEPSTGT  |
| 2   | ITEPSTGTS  | MUC5B     | 16146.7    |      | 6 ITEPSTGTS   | 37149.7 |            | 70 ITEPSTGTS  | 34750.2    |      | 55 ITEPSTGTS  | 41150.9 |            | 55 ITEPSTGTS  | 28751.5 |    | 29 ITEPSTGTS  | 10794.6 |  | 16 ITEPSTGTS  |
| 3   | TEPSTGTS   | MUC5B     | 33510.7    |      | 55 TEPSTGTS   | 42235.8 |            | 95 TEPSTGTS   | 33948.2    |      | 55 TEPSTGTS   | 38699.7 |            | 42 TEPSTGTS   | 26430.9 |    | 22 TEPSTGTS   | 36933.7 |  | 85 TEPSTGTS   |
| 4   | EPSTGTS    | MUC5B     | 28297.8    |      | 29 EPSTGTS    | 43280.8 |            | 95 EPSTGTS    | 39932.8    |      | 80 EPSTGTS    | 45688.7 |            | 85 EPSTGTS    | 26617.1 |    | 22 EPSTGTS    | 36508.5 |  | 85 EPSTGTS    |
| 5   | PSTGTS     | MUC5B     | 31955.8    |      | 46 PSTGTS     | 43609.8 |            | 95 PSTGTS     | 39963.9    |      | 80 PSTGTS     | 33229.8 |            | 29 PSTGTS     | 32326.2 |    | 44 PSTGTS     | 20996   |  | 34 PSTGTS     |
| 6   | STGTS      | MUC5B     | 8563.4     |      | 2.5 STGTS     | 18942.2 |            | 26 STGTS      | 23823.5    |      | 24 STGTS      | 40273.4 |            | 48 STGTS      | 25388.2 |    | 19 STGTS      | 912.7   |  | 2.5 STGTS     |
| 7   | TGTS       | MUC5B     | 26972.3    |      | 25 TGTS       | 35254.3 |            | 65 TGTS       | 33865.3    |      | 55 TGTS       | 41587.3 |            | 55 TGTS       | 32555.3 |    | 45 TGTS       | 2782.6  |  | 4.5 TGTS      |
| 8   | GTS        | MUC5B     | 17833.6    |      | 7.5 GTS       | 22785.6 |            | 32 GTS        | 26924.4    |      | 31 GTS        | 43965.1 |            | 70 GTS        | 31170.1 |    | 38 GTS        | 8287.9  |  | 12 GTS        |
| 0   | THITEPSTV  | MUC5B-WT  | 24917.9    |      | 19 THITEPSTV  | 31366.3 |            | 50 THITEPSTV  | 36530.7    |      | 65 THITEPSTV  | 14491.3 |            | 8.5 THITEPSTV | 28784.5 |    | 29 THITEPSTV  | 25690.2 |  | 46 THITEPSTV  |
| 1   | HITEPSTVT  | MUC5B-WT  | 29910      |      | 36 HITEPSTVT  | 26504.2 |            | 39 HITEPSTVT  | 23163.7    |      | 23 HITEPSTVT  | 43659.9 |            | 70 HITEPSTVT  | 23646.1 |    | 15 HITEPSTVT  | 18733.7 |  | 29 HITEPSTVT  |
| 2   | ITEPSTVTS  | MUC5B-WT  | 17540.6    |      | 7 ITEPSTVTS   | 28802.5 |            | 44 ITEPSTVTS  | 31647.2    |      | 43 ITEPSTVTS  | 37660   |            | 39 ITEPSTVTS  | 31076.8 |    | 38 ITEPSTVTS  | 8720    |  | 13 ITEPSTVTS  |
| 3   | TEPSTVTS   | MUC5B-WT  | 32325.8    |      | 47 TEPSTVTS   | 39227.1 |            | 80 TEPSTVTS   | 33405      |      | 49 TEPSTVTS   | 37764.1 |            | 39 TEPSTVTS   | 25049.3 |    | 18 TEPSTVTS   | 36494.3 |  | 85 TEPSTVTS   |
| 4   | EPSTVTS    | MUC5B-WT  | 26050.7    |      | 22 EPSTVTS    | 39902.6 |            | 85 EPSTVTS    | 39959.6    |      | 80 EPSTVTS    | 45225.9 |            | 80 EPSTVTS    | 24844.4 |    | 18 EPSTVTS    | 33665.9 |  | 75 EPSTVTS    |
| 5   | PSTVTS     | MUC5B-WT  | 28505.8    |      | 30 PSTVTS     | 42702.1 |            | 95 PSTVTS     | 40533.6    |      | 85 PSTVTS     | 35986.9 |            | 35 PSTVTS     | 33578.2 |    | 55 PSTVTS     | 16131.8 |  | 24 PSTVTS     |
| 6   | STVTS      | MUC5B-WT  | 14917.5    |      | 5 STVTS       | 15729.5 |            | 22 STVTS      | 22568.7    |      | 22 STVTS      | 41945.7 |            | 60 STVTS      | 12498.6 |    | 4.5 STVTS     | 360.6   |  | 1.2 STVTS     |
| 7   | TVTS       | MUC5B-WT  | 20820.7    |      | 11 TVTS       | 7578.7  |            | 13 TVTS       | 20392.6    |      | 19 TVTS       | 40414.9 |            | 49 TVTS       | 11897.2 |    | 4 TVTS        | 735.5   |  | 1.8 TVTS      |
| 8   | VTS        | MUC5B-WT  | 13167.3    |      | 4.5 VTS       | 20553.4 |            | 28 VTS        | 26849.1    |      | 30 VTS        | 38797.8 |            | 43 VTS        | 31672.2 |    | 41 VTS        | 8786.8  |  | 13 VTS        |

| HLA-B0702 |      | HLA-B0801  |         | HLA-B1501 |            | HLA-B2705 |      | HLA-B3901  |         | HLA-B4001 |            | HLA-B5801 |      |            |         |     |            |         |     |            |
|-----------|------|------------|---------|-----------|------------|-----------|------|------------|---------|-----------|------------|-----------|------|------------|---------|-----|------------|---------|-----|------------|
| nM        | Rank | Core       | nM      | Rank      | Core       | nM        | Rank | Core       | nM      | Rank      | Core       | nM        | Rank | Core       |         |     |            |         |     |            |
| 27556.3   | 27   | SCLKTSLKV  | 20385.1 | 25        | SCLKTSLKV  | 35446.3   | 70   | SCLKTSLKV  | 21429.8 | 21        | SCLKTSLKV  | 18393.1   | 9    | SCLKTSLKV  | 17966.8 | 11  | SCLKTSLKV  | 25068.8 | 36  | SCLKTSLKV  |
| 17124.8   | 12   | CLKTSKLV   | 166.1   | 0.4       | CLKTSKLV   | 3024.8    | 6.5  | CLKTSKLV   | 20377.8 | 19        | CLKTSKLV   | 25573.2   | 16   | CLKTSKLV   | 25403.0 | 22  | CLKTSKLV   | 22381.9 | 28  | CLKTSKLV   |
| 28730.9   | 30   | LKTSKLVLT  | 26239.9 | 38        | LKTSKLVLT  | 29704.5   | 85   | LKTSKLVLT  | 11321.0 | 10        | LKTSKLVLT  | 28318.3   | 21   | LKTSKLVLT  | 32810.7 | 48  | LKTSKLVLT  | 23657.1 | 32  | LKTSKLVLT  |
| 13821.5   | 9.5  | KTSKVLVTI  | 10886.8 | 11        | KTSKVLVTI  | 10108.6   | 14   | KTSKVLVTI  | 14653.1 | 13        | KTSKVLVTI  | 22905.7   | 13   | KTSKVLVTI  | 21719.7 | 15  | KTSKVLVTI  | 89.0    | 0.4 | KTSKVLVTI  |
| 21639.5   | 17   | TSKVLVTIT  | 22927.3 | 30        | TSKVLVTIT  | 29801.8   | 47   | TSKVLVTIT  | 28101.9 | 34        | TSKVLVTIT  | 27028.1   | 18   | TSKVLVTIT  | 27902.6 | 29  | TSKVLVTIT  | 6460.6  | 6   | TSKVLVTIT  |
| 26223.8   | 24   | SLKVLVTITN | 22826.8 | 30        | SLKVLVTITN | 17661.3   | 24   | SLKVLVTITN | 30314.6 | 40        | SLKVLVTITN | 31274.8   | 27   | SLKVLVTITN | 30078.7 | 37  | SLKVLVTITN | 23575.8 | 31  | SLKVLVTITN |
| 33041.9   | 44   | LKVLVTITNC | 32128.5 | 60        | LKVLVTITNC | 30914.1   | 55   | LKVLVTITNC | 19859.3 | 19        | LKVLVTITNC | 24242.9   | 15   | LKVLVTITNC | 25678.2 | 23  | LKVLVTITNC | 24598.3 | 34  | LKVLVTITNC |
| 14395.8   | 10   | KVLVTITNCV | 13616.6 | 14        | KVLVTITNCV | 16666.0   | 22   | KVLVTITNCV | 18816.6 | 17        | KVLVTITNCV | 16106.5   | 7.5  | KVLVTITNCV | 26189.8 | 24  | KVLVTITNCV | 6977.1  | 6   | KVLVTITNCV |
| 14572.1   | 10   | VLTIITNCVL | 8999.2  | 8.5       | VLTIITNCVL | 3148.5    | 6.5  | VLTIITNCVL | 27225.6 | 32        | VLTIITNCVL | 6396.7    | 3    | VLTIITNCVL | 17584.1 | 10  | VLTIITNCVL | 15597.0 | 16  | VLTIITNCVL |
| 24457.7   | 21   | SCLKTSLKFL | 18906.2 | 22        | SCLKTSLKFL | 12192.1   | 17   | SCLKTSLKFL | 16057.5 | 14        | SCLKTSLKFL | 22803.8   | 13   | SCLKTSLKFL | 15928.0 | 9   | SCLKTSLKFL | 7043.7  | 6   | SCLKTSLKFL |
| 24320.5   | 21   | CLKTSLKFL  | 403.7   | 0.8       | CLKTSLKFL  | 8917.3    | 13   | CLKTSLKFL  | 16386.9 | 15        | CLKTSLKFL  | 31272.4   | 27   | CLKTSLKFL  | 26447.5 | 25  | CLKTSLKFL  | 21643.4 | 27  | CLKTSLKFL  |
| 28399.9   | 29   | LKTSLKFLT  | 26637.0 | 39        | LKTSLKFLT  | 40774.2   | 90   | LKTSLKFLT  | 7437.7  | 7.5       | LKTSLKFLT  | 28468.5   | 21   | LKTSLKFLT  | 32413.8 | 46  | LKTSLKFLT  | 17037.6 | 18  | LKTSLKFLT  |
| 11961.5   | 8.5  | KTSLKFLTI  | 3824.0  | 4         | KTSLKFLTI  | 8506.3    | 13   | KTSLKFLTI  | 13668.4 | 12        | KTSLKFLTI  | 22210.9   | 12   | KTSLKFLTI  | 16846.0 | 9.5 | KTSLKFLTI  | 214.2   | 0.6 | KTSLKFLTI  |
| 24680.2   | 22   | TSLKFLTIT  | 21683.7 | 27        | TSLKFLTIT  | 30884.4   | 50   | TSLKFLTIT  | 29789.5 | 39        | TSLKFLTIT  | 26991.2   | 18   | TSLKFLTIT  | 28290.1 | 30  | TSLKFLTIT  | 11289.0 | 10  | TSLKFLTIT  |
| 25907.6   | 24   | SLKFLTITN  | 23743.5 | 32        | SLKFLTITN  | 16284.7   | 22   | SLKFLTITN  | 27218.2 | 32        | SLKFLTITN  | 30467.5   | 25   | SLKFLTITN  | 30028.0 | 36  | SLKFLTITN  | 23841.8 | 32  | SLKFLTITN  |
| 31053.9   | 37   | LKFLTITNC  | 28544.1 | 45        | LKFLTITNC  | 25569.0   | 37   | LKFLTITNC  | 15206.4 | 14        | LKFLTITNC  | 21109.2   | 11   | LKFLTITNC  | 22723.1 | 17  | LKFLTITNC  | 25472.9 | 37  | LKFLTITNC  |
| 26333.0   | 25   | KFLTITNCV  | 16276.6 | 18        | KFLTITNCV  | 25240.0   | 37   | KFLTITNCV  | 22228.4 | 22        | KFLTITNCV  | 22206.8   | 12   | KFLTITNCV  | 25532.2 | 22  | KFLTITNCV  | 18329.9 | 20  | KFLTITNCV  |
| 13258.4   | 9    | FLTIITNCVL | 1913.3  | 2.5       | FLTIITNCVL | 1564.3    | 4.5  | FLTIITNCVL | 22289.1 | 22        | FLTIITNCVL | 255.9     | 0.4  | FLTIITNCVL | 13434.7 | 7   | FLTIITNCVL | 15299.2 | 15  | FLTIITNCVL |
| 33182.7   | 44   | TGDTTLPDP  | 38133.6 | 85        | TGDTTLPDP  | 40832.4   | 90   | TGDTTLPDP  | 35838.5 | 65        | TGDTTLPDP  | 17806.0   | 8.5  | TGDTTLPDP  | 29867.6 | 36  | TGDTTLPDP  | 18286.3 | 20  | TGDTTLPDP  |
| 39119.9   | 75   | GDTTLPDP   | 41928.9 | 99        | GDTTLPDP   | 41533.3   | 95   | GDTTLPDP   | 36528.7 | 65        | GDTTLPDP   | 41805.2   | 90   | GDTTLPDP   | 28836.2 | 32  | GDTTLPDP   | 30231.4 | 55  | GDTTLPDP   |
| 37486.8   | 65   | DTTLPDPT   | 40006.3 | 95        | DTTLPDPT   | 43156.9   | 99   | DTTLPDPT   | 40361.1 | 85        | DTTLPDPT   | 34506.0   | 38   | DTTLPDPT   | 33618.9 | 55  | DTTLPDPT   | 14185.2 | 14  | DTTLPDPT   |
| 30956.3   | 37   | TTPLPDPT   | 40324.9 | 95        | TTPLPDPT   | 38704.3   | 80   | TTPLPDPT   | 37769.0 | 70        | TTPLPDPT   | 39804.7   | 70   | TTPLPDPT   | 33971.8 | 55  | TTPLPDPT   | 29591.6 | 55  | TTPLPDPT   |
| 12880.7   | 9    | TPLPDDTS   | 34478.0 | 70        | TPLPDDTS   | 38758.4   | 80   | TPLPDDTS   | 40258.6 | 85        | TPLPDDTS   | 18545.3   | 9    | TPLPDDTS   | 34706.3 | 60  | TPLPDDTS   | 29418.0 | 55  | TPLPDDTS   |
| 36859.4   | 65   | PLPDDTSS   | 41962.0 | 99        | PLPDDTSS   | 33874.1   | 60   | PLPDDTSS   | 39257.3 | 80        | PLPDDTSS   | 41848.6   | 90   | PLPDDTSS   | 37812.3 | 80  | PLPDDTSS   | 32475.9 | 65  | PLPDDTSS   |
| 870.1     | 1.6  | LPDDTSSA   | 16718.4 | 18        | LPDDTSSA   | 36239.7   | 70   | LPDDTSSA   | 34618.9 | 60        | LPDDTSSA   | 13034.5   | 5.5  | LPDDTSSA   | 31579.8 | 42  | LPDDTSSA   | 31392.4 | 60  | LPDDTSSA   |
| 36415.0   | 60   | PDDTSSAS   | 39536.0 | 90        | PDDTSSAS   | 37932.4   | 80   | PDDTSSAS   | 39673.6 | 80        | PDDTSSAS   | 38334.2   | 60   | PDDTSSAS   | 35576.9 | 65  | PDDTSSAS   | 36966.8 | 90  | PDDTSSAS   |
| 35300.9   | 55   | DDTSSAST   | 32588.5 | 60        | DDTSSAST   | 38472.2   | 80   | DDTSSAST   | 35201.7 | 13        | DDTSSAST   | 23204.1   | 13   | DDTSSAST   | 32083.0 | 44  | DDTSSAST   | 28074.6 | 46  | DDTSSAST   |
| 24997.6   | 22   | TGDTTLPVP  | 26369.5 | 38        | TGDTTLPVP  | 32974.8   | 60   | TGDTTLPVP  | 25683.2 | 28        | TGDTTLPVP  | 2202.4    | 1.2  | TGDTTLPVP  | 23495.3 | 18  | TGDTTLPVP  | 15428.5 | 15  | TGDTTLPVP  |
| 35328.4   | 55   | GDTTLPVPT  | 38124.5 | 85        | GDTTLPVPT  | 37245.5   | 75   | GDTTLPVPT  | 35706.9 | 65        | GDTTLPVPT  | 39088.6   | 65   | GDTTLPVPT  | 26090.2 | 24  | GDTTLPVPT  | 28410.4 | 47  | GDTTLPVPT  |
| 3670.0    | 60   | DTTLPVTD   | 37629.1 | 85        | DTTLPVTD   | 41795.3   | 95   | DTTLPVTD   | 38409.0 | 85        | DTTLPVTD   | 30292.0   | 25   | DTTLPVTD   | 35017.8 | 60  | DTTLPVTD   | 15299.5 | 15  | DTTLPVTD   |
| 29719.6   | 33   | TTPLPVTD   | 39515.5 | 90        | TTPLPVTD   | 37068.6   | 70   | TTPLPVTD   | 37220.9 | 70        | TTPLPVTD   | 36839.1   | 49   | TTPLPVTD   | 33156.5 | 49  | TTPLPVTD   | 29228.5 | 55  | TTPLPVTD   |
| 8535.6    | 6.5  | TPLPVTDTS  | 31122.2 | 55        | TPLPVTDTS  | 36710.2   | 75   | TPLPVTDTS  | 38165.0 | 75        | TPLPVTDTS  | 14637.2   | 6.5  | TPLPVTDTS  | 32851.9 | 48  | TPLPVTDTS  | 25774.3 | 38  | TPLPVTDTS  |
| 36975.2   | 65   | PLPVDTS    | 40276.5 | 95        | PLPVDTS    | 35378.9   | 90   | PLPVDTS    | 40778.6 | 90        | PLPVDTS    | 41616.1   | 85   | PLPVDTS    | 36235.4 | 70  | PLPVDTS    | 32727.7 | 70  | PLPVDTS    |
| 279.9     | 0.8  | LPVDTSSA   | 8981.4  | 8.5       | LPVDTSSA   | 27288.1   | 41   | LPVDTSSA   | 34261.2 | 55        | LPVDTSSA   | 15930.4   | 7    | LPVDTSSA   | 31942.3 | 44  | LPVDTSSA   | 30803.3 | 60  | LPVDTSSA   |
| 29518.7   | 32   | PVDTSSAS   | 35392.6 | 75        | PVDTSSAS   | 31213.9   | 55   | PVDTSSAS   | 36508.1 | 65        | PVDTSSAS   | 34555.3   | 38   | PVDTSSAS   | 34958.4 | 60  | PVDTSSAS   | 32435.1 | 65  | PVDTSSAS   |
| 24302.0   | 21   | VTDTSSAST  | 31501.6 | 55        | VTDTSSAST  | 29978.3   | 48   | VTDTSSAST  | 32892.1 | 49        | VTDTSSAST  | 23241.5   | 13   | VTDTSSAST  | 26807.9 | 26  | VTDTSSAST  | 15799.1 | 16  | VTDTSSAST  |
| 34209.3   | 48   | THITEPSTG  | 37004.4 | 80        | THITEPSTG  | 33105.6   | 60   | THITEPSTG  | 38795.3 | 80        | THITEPSTG  | 3451.2    | 1.7  | THITEPSTG  | 32635.4 | 47  | THITEPSTG  | 27786.0 | 45  | THITEPSTG  |
| 20078.6   | 15   | HITEPSTGT  | 34825.9 | 70        | HITEPSTGT  | 29373.4   | 46   | HITEPSTGT  | 27444.4 | 32        | HITEPSTGT  | 26904.9   | 18   | HITEPSTGT  | 28825.3 | 32  | HITEPSTGT  | 22536.7 | 29  | HITEPSTGT  |
| 22865.1   | 19   | ITEPSTGTS  | 32337.7 | 60        | ITEPSTGTS  | 31001.2   | 55   | ITEPSTGTS  | 36978.4 | 70        | ITEPSTGTS  | 34217.5   | 37   | ITEPSTGTS  | 27753.8 | 29  | ITEPSTGTS  | 24129.4 | 33  | ITEPSTGTS  |
| 28409.8   | 29   | TEPSTGSH   | 41149.5 | 95        | TEPSTGSH   | 13614.3   | 18   | TEPSTGSH   | 34149.8 | 55        | TEPSTGSH   | 26483.8   | 18   | TEPSTGSH   | 4771.2  | 3   | TEPSTGSH   | 31651.3 | 65  | TEPSTGSH   |
| 8110.7    | 6    | EPSTGTSHT  | 22690.9 | 29        | EPSTGTSHT  | 36949.6   | 75   | EPSTGTSHT  | 36898.5 | 70        | EPSTGTSHT  | 18282.7   | 9    | EPSTGTSHT  | 35127.5 | 60  | EPSTGTSHT  | 24094.2 | 33  | EPSTGTSHT  |
| 36860.6   | 65   | PSTGTSHTP  | 36341.4 | 75        | PSTGTSHTP  | 33340.7   | 60   | PSTGTSHTP  | 37773.9 | 70        | PSTGTSHTP  | 30868.0   | 26   | PSTGTSHTP  | 31889.2 | 44  | PSTGTSHTP  | 15276.8 | 15  | PSTGTSHTP  |
| 12223.0   | 8.5  | STGTSHTPA  | 6898.5  | 6.5       | STGTSHTPA  | 7802.7    | 12   | STGTSHTPA  | 27842.5 | 33        | STGTSHTPA  | 22524.3   | 13   | STGTSHTPA  | 22890.9 | 17  | STGTSHTPA  | 15827.5 | 16  | STGTSHTPA  |
| 18917.0   | 14   | TGTSHTPAA  | 16165.0 | 18        | TGTSHTPAA  | 23254.1   | 33   | TGTSHTPAA  | 32591.0 | 48        | TGTSHTPAA  | 21983.3   | 12   | TGTSHTPAA  | 30527.2 | 38  | TGTSHTPAA  | 27458.7 | 44  | TGTSHTPAA  |
| 22414.9   | 18   | GTSHTPAA   | 32390.6 | 60        | GTSHTPAA   | 24258.7   | 35   | GTSHTPAA   | 27982.4 | 34        | GTSHTPAA   | 23759.4   | 14   | GTSHTPAA   | 23814.0 | 19  | GTSHTPAA   | 9924.8  | 9   | GTSHTPAA   |
| 28839.9   | 30   | THITEPSTV  | 30481.0 | 55        | THITEPSTV  | 32055.6   | 55   | THITEPSTV  | 31947.5 | 45        | THITEPSTV  | 41.4      | 0.1  | THITEPSTV  | 24387.1 | 20  | THITEPSTV  | 24738.2 | 35  | THITEPSTV  |
| 13740.3   | 9.5  | HITEPSTVT  | 28214.6 | 44        | HITEPSTVT  | 21257.3   | 29   | HITEPSTVT  | 30132.8 | 40        | HITEPSTVT  | 18532.1   | 9    | HITEPSTVT  | 28304.5 | 30  | HITEPSTVT  | 20023.3 | 23  | HITEPSTVT  |
| 25699.1   | 23   | ITEPSTVTS  | 31360.9 | 55        | ITEPSTVTS  | 27915.2   | 43   | ITEPSTVTS  | 35518.9 | 60        | ITEPSTVTS  | 27993.3   | 20   | ITEPSTVTS  | 27269.2 | 27  | ITEPSTVTS  | 20326.5 | 24  | ITEPSTVTS  |
| 29121.8   | 31   | TEPSTVTSHT | 40502.0 | 95        | TEPSTVTSHT | 34191.2   | 22   | TEPSTVTSHT | 34191.2 | 55        | TEPSTVTSHT | 26017.2   | 17   | TEPSTVTSHT | 8419.4  | 4.5 | TEPSTVTSHT | 31517.3 | 60  | TEPSTVTSHT |
| 10107.2   | 7    | EPSTVTSHT  | 22244.8 | 28        | EPSTVTSHT  | 36636.3   | 75   | EPSTVTSHT  | 35694.9 | 60        | EPSTVTSHT  | 18818.8   | 9    | EPSTVTSHT  | 34508.9 | 60  | EPSTVTSHT  | 22397.2 | 28  | EPSTVTSHT  |
| 38080.8   | 70   | PSTVTSHTP  | 35728.5 | 75        | PSTVTSHTP  | 34664.6   | 65   | PSTVTSHTP  | 39960.9 | 85        | PSTVTSHTP  | 33930.6   | 36   | PSTVTSHTP  | 30352.0 | 38  | PSTVTSHTP  | 13608.8 | 13  | PSTVTSHTP  |
| 9025.5    | 6.5  | STVTSHTPA  | 12584.5 | 13        | STVTSHTPA  | 4411.5    | 8    | STVTSHTPA  | 25664.6 | 28        | STVTSHTPA  | 15634.5   | 7    | STVTSHTPA  | 19050.9 | 12  | STVTSHTPA  | 11779.8 | 11  | STVTSHTPA  |
| 5624.4    | 4.5  | TVTSHTPAA  | 14246.3 | 15        | TVTSHTPAA  | 13512.9   | 18   | TVTSHTPAA  | 30088.2 | 39        | TVTSHTPAA  | 16246.4   | 7.5  | TVTSHTPAA  | 25936.8 | 23  | TVTSHTPAA  | 26536.0 | 40  | TVTSHTPAA  |
| 18640.1   | 14   | VTSHTPAA   | 30955.0 | 55        | VTSHTPAA   | 22136.3   | 31   | VTSHTPAA   | 30793.0 | 42        | VTSHTPAA   | 22669.0   | 13   | VTSHTPAA   | 26278.3 | 24  | VTSHTPAA   | 8478.5  | 7.5 | VTSHTPAA   |

| HLA-C0401 |      | HLA-C0602      |         | HLA-C0702      |         | Core           | H_Avg_Rank | N_binders |
|-----------|------|----------------|---------|----------------|---------|----------------|------------|-----------|
| nM        | Rank | nM             | Rank    | nM             | Rank    |                |            |           |
| 19383.4   |      | 11 SCLKTSLKV   | 17768.8 | 7 SCLKTSLKV    | 39704.1 | 36 SCLKTSLKV   | 16.873     | 0         |
| 15731.1   |      | 7 CLKTSLKVL    | 12354.8 | 4.5 CLKTSLKVL  | 15399.3 | 5.5 CLKTSLKVL  | 4.132      | 1         |
| 20658     |      | 12 LKTSLKVLT   | 35110   | 24 LKTSLKVLT   | 40379.5 | 39 LKTSLKVLT   | 28.829     | 0         |
| 25688.8   |      | 18 KTSLKVLT    | 19365.4 | 7.5 KTSLKVLT   | 33165.5 | 21 KTSLKVLT    | 3.133      | 2         |
| 26396.6   |      | 19 TSLKVLIT    | 37862.7 | 30 TSLKVLIT    | 43416.8 | 55 TSLKVLIT    | 20.032     | 0         |
| 28800.7   |      | 23 SLKVLITIN   | 41635   | 43 SLKVLITIN   | 37291   | 29 SLKVLITIN   | 25.835     | 0         |
| 29522.2   |      | 24 LKVLITINC   | 41173.6 | 41 LKVLITINC   | 42650.9 | 49 LKVLITINC   | 31.717     | 0         |
| 15979.5   |      | 7 KVLITINCV    | 13855.7 | 5 KVLITINCV    | 36254.2 | 27 KVLITINCV   | 4.256      | 2         |
| 22882.2   |      | 15 VLTITINCVL  | 27471.8 | 14 VLTITINCVL  | 23295.6 | 10 VLTITINCVL  | 8.788      | 0         |
| 12571.3   |      | 4.5 SCLKTSLKFL | 24873.7 | 12 SCLKTSLKFL  | 21184.2 | 9 SCLKTSLKFL   | 8.543      | 1         |
| 14434.3   |      | 6 CLKTSLKFL    | 10296.2 | 3.5 CLKTSLKFL  | 22704.4 | 10 CLKTSLKFL   | 5.719      | 1         |
| 25585.3   |      | 18 LKTSLKFLT   | 36790.9 | 27 LKTSLKFLT   | 34745.3 | 23 LKTSLKFLT   | 25.64      | 0         |
| 21168.7   |      | 13 KTSLKFLTI   | 32537.1 | 20 KTSLKFLTI   | 37566.4 | 30 KTSLKFLTI   | 2.995      | 3         |
| 28837.1   |      | 23 TSLKFLTIT   | 35428.7 | 24 TSLKFLTIT   | 42073.4 | 46 TSLKFLTIT   | 21.036     | 0         |
| 26594.7   |      | 19 SLKFLTITIN  | 42365.7 | 47 SLKFLTITIN  | 36611.8 | 27 SLKFLTITIN  | 22.987     | 0         |
| 23894     |      | 16 LKFLTITNC   | 26974.9 | 13 LKFLTITNC   | 38018.2 | 31 LKFLTITNC   | 22.347     | 0         |
| 11085     |      | 3.5 KFLTITINCV | 16447.5 | 6 KFLTITINCV   | 29680.1 | 16 KFLTITINCV  | 6.761      | 1         |
| 16455.3   |      | 7.5 FLTITINCVL | 9802.8  | 3.5 FLTITINCVL | 6123.2  | 1.9 FLTITINCVL | 2.815      | 3         |
| 21456.7   |      | 13 TGDTPPLPD   | 44681.1 | 65 TGDTPPLPD   | 37137.6 | 29 TGDTPPLPD   | 32.022     | 0         |
| 32213.8   |      | 29 GDTTPLPDT   | 42251.7 | 46 GDTTPLPDT   | 42881.3 | 50 GDTTPLPDT   | 58.881     | 0         |
| 31221.7   |      | 27 DTTPLPDDT   | 44692.3 | 65 DTTPLPDDT   | 34489.5 | 23 DTTPLPDDT   | 44.768     | 0         |
| 31718.1   |      | 28 TTPLPDDT    | 41337   | 42 TTPLPDDT    | 43183.5 | 55 TTPLPDDT    | 54.292     | 0         |
| 20112.1   |      | 11 TPLPDDTSS   | 44067.1 | 60 TPLPDDTSS   | 36992   | 28 TPLPDDTSS   | 30.453     | 0         |
| 29028.4   |      | 23 PLPDDTSS    | 40790   | 39 PLPDDTSS    | 40795.3 | 40 PLPDDTSS    | 56.274     | 0         |
| 13268.3   |      | 5 LPDDTSSA     | 43786.2 | 55 LPDDTSSA    | 45046.7 | 65 LPDDTSSA    | 12.273     | 1         |
| 28344.4   |      | 22 PDTDTSSAS   | 39864.2 | 36 PDTDTSSAS   | 38694.7 | 33 PDTDTSSAS   | 57.59      | 0         |
| 21086.1   |      | 13 DTDSSAST    | 42110.7 | 45 DTDSSAST    | 43671.2 | 55 DTDSSAST    | 12.933     | 1         |
| 14014.4   |      | 5.5 TGDTPPLPV  | 36857   | 27 TGDTPPLPV   | 32290.2 | 20 TGDTPPLPV   | 7.242      | 2         |
| 29032.5   |      | 23 GDTTPLPVT   | 42462.1 | 47 GDTTPLPVT   | 40985.1 | 41 GDTTPLPVT   | 48.812     | 0         |
| 27407.3   |      | 20 DTTPLPVD    | 44511.8 | 60 DTTPLPVD    | 29745.1 | 16 DTTPLPVD    | 38.397     | 0         |
| 31228.8   |      | 27 TTPLPVDT    | 35777.3 | 25 TTPLPVDT    | 41651.2 | 44 TTPLPVDT    | 42.698     | 0         |
| 14262.6   |      | 5.5 TPLPVDTSS  | 44879.8 | 65 TPLPVDTSS   | 36874.2 | 28 TPLPVDTSS   | 21.203     | 0         |
| 32440.4   |      | 29 PLPVDTSS    | 43894.3 | 55 PLPVDTSS    | 43324.8 | 55 PLPVDTSS    | 60.786     | 0         |
| 16467.1   |      | 7.5 LPVDTSSA   | 45299.8 | 70 LPVDTSSA    | 44822   | 65 LPVDTSSA    | 8.354      | 1         |
| 27497.7   |      | 21 PVDTSSAS    | 35259.6 | 24 PVDTSSAS    | 35992.8 | 26 PVDTSSAS    | 40.42      | 0         |
| 18405.8   |      | 9.5 VTDSSAST   | 38953   | 33 VTDSSAST    | 41545.9 | 43 VTDSSAST    | 7.978      | 1         |
| 27385.7   |      | 20 HITEPSTG    | 39329.1 | 34 HITEPSTG    | 40562.1 | 39 HITEPSTG    | 17.267     | 1         |
| 27767.6   |      | 21 HITEPSTGT   | 38823.9 | 33 HITEPSTGT   | 36722.9 | 28 HITEPSTGT   | 26.954     | 0         |
| 25497.7   |      | 18 ITEPSTGTS   | 41954.3 | 44 ITEPSTGTS   | 35426.8 | 25 ITEPSTGTS   | 25.553     | 0         |
| 13837.9   |      | 5.5 TEPSTGSH   | 41870.4 | 44 TEPSTGSH    | 36577.7 | 27 TEPSTGSH    | 17.927     | 0         |
| 20693.3   |      | 12 EPSTGTSHT   | 45346.9 | 70 EPSTGTSHT   | 41883.5 | 45 EPSTGTSHT   | 25.269     | 0         |
| 34896.4   |      | 35 PSTGTSHTP   | 35552.3 | 25 PSTGTSHTP   | 39728.1 | 36 PSTGTSHTP   | 38.53      | 0         |
| 20473.3   |      | 12 STGTSHTPA   | 45162.3 | 65 STGTSHTPA   | 36078.5 | 26 STGTSHTPA   | 9.557      | 0         |
| 16585.1   |      | 7.5 TGTSHTPAA  | 36576.5 | 27 TGTSHTPAA   | 34113.2 | 22 TGTSHTPAA   | 18.55      | 0         |
| 26845.9   |      | 20 GTSHTPAAT   | 44896.8 | 65 GTSHTPAAT   | 32883.9 | 20 GTSHTPAAT   | 19.962     | 0         |
| 18366     |      | 9.5 THITEPSTV  | 20682.3 | 8.5 THITEPSTV  | 27810   | 14 THITEPSTV   | 1.492      | 1         |
| 25621.3   |      | 18 HITEPSTVT   | 28064.5 | 14 HITEPSTVT   | 31847.1 | 19 HITEPSTVT   | 20.851     | 0         |
| 23743.2   |      | 16 ITEPSTVTS   | 40897   | 40 ITEPSTVTS   | 32236.8 | 19 ITEPSTVTS   | 23.251     | 0         |
| 17404.7   |      | 8.5 TEPSTVTSHT | 37821.3 | 30 TEPSTVTSHT  | 34127.6 | 22 TEPSTVTSHT  | 21.399     | 0         |
| 18317.8   |      | 9.5 EPSTVTSHT  | 45743.1 | 70 EPSTVTSHT   | 41765   | 44 EPSTVTSHT   | 24.044     | 0         |
| 35693.8   |      | 38 PSTVTSHTP   | 35664   | 25 PSTVTSHTP   | 40819.6 | 40 PSTVTSHTP   | 37.992     | 0         |
| 18185.5   |      | 9 STVTSHTPA    | 45670.9 | 70 STVTSHTPA   | 34935.3 | 24 STVTSHTPA   | 7.147      | 1         |
| 11676.8   |      | 3.5 TVTSHTPAA  | 27630.7 | 14 TVTSHTPAA   | 33025.8 | 21 TVTSHTPAA   | 7.909      | 1         |
| 26905.8   |      | 20 VTSHTPAAT   | 42673.1 | 48 VTSHTPAAT   | 29924.2 | 17 VTSHTPAAT   | 16.965     | 0         |

Supplementary Table 2. MHC-I binding predictions for 9 amino-acid peptides produced by the top 3 mutations described in the main text. Both mutated and wild type (marked WT) peptides were documented.

| Sample ID    | Cancer | HLA-A genotype |         | HLA-B genotype |         | HLA-C genotype |         | CDR3 motif Mutation |               |
|--------------|--------|----------------|---------|----------------|---------|----------------|---------|---------------------|---------------|
| TCGA-4K-AA1I | TGCT   | A*01:01        | A*30:01 | B*13:02        | B*13:02 | C*06:02        | C*06:02 | GESEQY              | PRAMEF4 F300V |
| TCGA-2G-AAGE | TGCT   | A*01:01        | A*01:01 | B*08:01        | B*57:01 | C*07:01        | C*07:01 | GESEQY              | PRAMEF4 F300V |
| TCGA-2G-AAKO | TGCT   | A*01:01        | A*02:01 | B*08:01        | B*18:01 | C*07:01        | C*12:03 | GESEQY              | PRAMEF4 F300V |
| TCGA-B8-4621 | KIRC   | A*68:02        | A*74:01 | B*53:01        | B*53:01 | C*04:01        | C*04:01 | GLAEQY              | MUC4 V4195D   |
| TCGA-G8-6325 | DLBC   | A*02:02        | A*68:02 | B*35:01        | B*58:01 | C*04:01        | C*07:18 | GLAEQY              | MUC4 V4195D   |
| TCGA-FF-8041 | DLBC   | A*01:01        | A*02:07 | B*15:02        | B*15:17 | C*07:01        | C*08:01 | GLAEQY              | MUC4 V4195D   |
| TCGA-BH-A0HA | BRCA   | A*03:01        | A*31:01 | B*07:02        | B*07:02 | C*07:02        | C*07:02 | RDNSYEQY            | MUC5B V3490G  |
| TCGA-G8-6326 | DLBC   | A*01:01        | A*33:03 | B*08:01        | B*50:01 | C*06:02        | C*07:01 | RDNSYEQY            | MUC5B V3490G  |
| TCGA-FF-A7CR | DLBC   | A*24:07        | A*24:10 | B*15:02        | B*27:06 | C*03:04        | C*07:02 | RDNSYEQY            | MUC5B V3490G  |

Supplementary Table 3. HLA typing information for the 9 individuals carrying any of the top 3 mutations and the corresponding CDR3 motifs. Two alleles of HLA-A,B,C genes for each individual were solved using POLYSOLVER.
